# Supplementary material for: Post-translational regulation of rice MADS29 function: homodimerization or binary interactions with other seed-expressed MADS proteins modulate its translocation into the nucleus
Source: PubMed Central journal article supplement (PMC4157715; doi:10.1093/jxb/eru296), 2014-08-05
Supplement: supp_eru296_jexbot124214_file001.pdf [file supp_eru296_jexbot124214_file001.pdf]

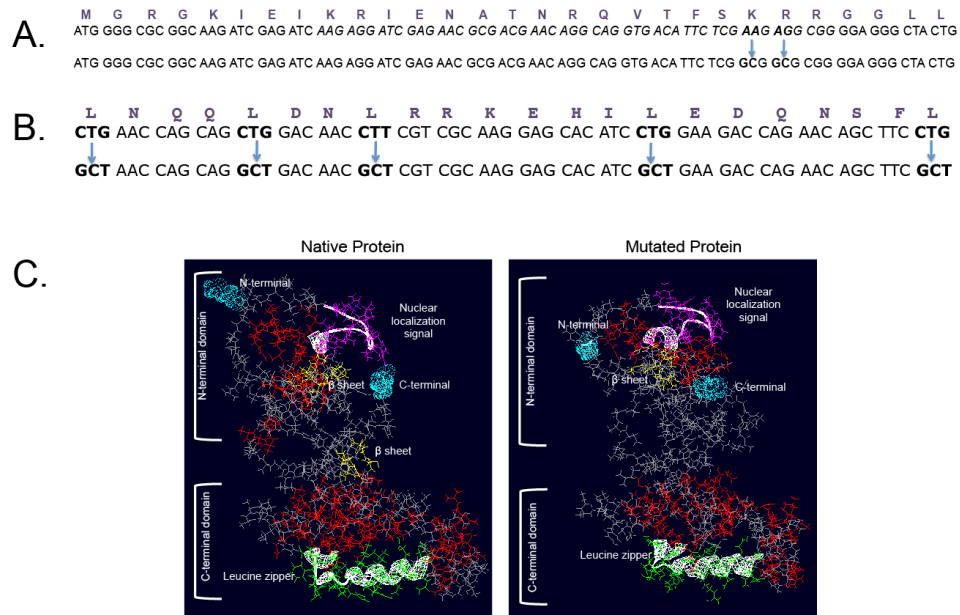

Figure S1. Representation of mutated motifs in MADS29 domains for studying their importance in homo dimer localization and dimerization (A) Mutation of lysine and arginine to alanine in the NLS (B) Leucine to alanine mutation in leucine zipper present in IKC domain (C) Comparison of native protein and mutated (Leucine zipper) protein modeled using web based I-TASSER prediction program.

Table S1: List of primers used for DNA amplification/sequencing

| Gene ID/ Primer name           | Forward Primer (5' to 3')                                                                    | Reverse Primer (5' to 3')                                                                      |
|--------------------------------|----------------------------------------------------------------------------------------------|------------------------------------------------------------------------------------------------|
| M13 (TOPO)<br>(for sequencing) | GTAAAACGACGGCCAG                                                                             | CAGGAAACAGCTATGAC                                                                              |
| M29ΔMADS                       | CACCATGTACCAGACCGTCACCAACACTCAT                                                              |                                                                                                |
| M29ΔKC                         |                                                                                              | ATGAGTGTGGTGACGGTCTGGTA                                                                        |
| M29MutLZ                       | CATCAGCTCGCTAACCAGCAGGCTGACAACGCTC<br>GTCGCAAGGAGCACATCGCTGAAGACCAGAACAG<br>CTTCGCTTGCCGCATG | CATGCGGCAAGCGAAGCTGTTCTGGTCTTCA<br>GCGATGTGCTCCTTGCGACGAGCGTTGTGTCAG<br>CCTGCTGGTTAGCGAGCTGATG |
| M29Mut NLS                     | ACATTCTCGGCGGCG CGGGGAGGG                                                                    | CCCTCCCCGCGCCCGGAGAATGT                                                                        |
| OsMADS27cds                    | CACCATGGGGAGGGGGAAGATTGTGATCC                                                                | TGGATTCAACTGTAACCCTAGCTTA                                                                      |
| OsMADS14cds                    | CACCATGGGGCGGGGCAAGGTGCAGCTG                                                                 | CATAACAATGAAAATTGCCAT                                                                          |
| OsMADS15cds                    | CACCATGGGAGAGGATCT AGAATCCCTG                                                                | AGCATTGAGGTGGCTCAG CATCCAT                                                                     |
| OsMADS16cds                    | CACCATGGGGAGGGGCAAGATCGAGATC                                                                 | ACCGAGGCGCAGGTCGTGGTTGCCG                                                                      |
| OsMADS17cds                    | CACCATGGATCGATCAGA GATGGGGAGG                                                                | GAGGGGCCATCCCATCACAAAGTT                                                                       |
| OsMADS18/28cds                 | CACCATGGGGAGAGGGCCGGTGCAGCTGC                                                                | TGTGTGACTTGTCGGAG CATCCAT                                                                      |
| OsMADS1cds                     | CACCATGGGGAGGGGGAAGGTGGAGCTG                                                                 | TATCCAGCCGGATGGGAT GTGTT                                                                       |
| OsMADS22cds                    | CACCATGGCGCGGGAGAGGCGGGAGATA                                                                 | CTTCCATGCACC ACA AGG CAG CCC                                                                   |
| OsMADS25cds                    | CACCATGGGGAGAGGGAAGATTGCCATC                                                                 | TTCATCTCAACTTCTTTTTGACTC                                                                       |
| OsMADS26cds                    | CACCATGGCGCGAGGCAAGGTGCAGCTC                                                                 | GAAGGAATAGCCCATCTC CGAG                                                                        |
| OsMADS30cds                    | CACCATGGGGCAAGGGAAGATCGAGATGA                                                                | TATAAACCCAGAATCGCCA AG                                                                         |
| OsMADS31cds                    | CACCATGGGGCGTGGGAGAGTAGAGCTCA                                                                | AAACTTGATTATTTCAATATAGTGT                                                                      |
| OsMADS32cds                    | CACCATGGGGAGGGGGCGCAGCGAGATAA                                                                | GTTGAACCCAGTTAAGGTCCAAG                                                                        |
| OsMADS33cds                    | CACCATGGTCAGAGGAAA GGTGCAAATGC                                                               | TGAGAAGAAGCGATTTC GTAGGTC                                                                      |
| OsMADS34cds                    | CACCATGGGGCGAGGCAAGGTGGTGCTT                                                                 | TTCCTGATAGTTGTTCTGCATCTCA                                                                      |
| OsMADS37cds                    | CACCATGGAGGGAGGAGGGAGGAGGAGG                                                                 | AGAGCTCACTCCTGATCT TGGCTC                                                                      |
| OsMADS3cds                     | CACCATGATGAACATGATGACCGATCTG                                                                 | GGCAAGCCGAGTTAGACT GTTTG                                                                       |
| OsMADS4cds                     | CACCATGGGGCGGGCAAGATCGAGAT                                                                   | CTTCTCCTGCTGGAGGTT GGGGT                                                                       |
| OsMADS50cds                    | CACCATGGTGCGGGGGAAGACGCAGATGAA                                                               | AGAATGGGGCATCGCTTG GCTATCT                                                                     |
| OsMADS55cds                    | CACCATGGCGAGGGAGAGGGAGGAGATA                                                                 | AGGCAACCCTAGTTTCAG GGATAT                                                                      |
| OsMADS56cds                    | CACCATGGTGCGGGGAGGACGGAGCTGA                                                                 | ACCTGTCTCCGACCGGTT GGAGGA                                                                      |
| OsMADS5cds                     | CACCATGGGGCGAGGGAAAGTAGAGCTGA                                                                | TTGGTTGAGGTGATCCAT GTAAGC                                                                      |
| OsMADS60cds                    | CACCATGGAAAAGGCCGCGGCAATCAGG                                                                 | TATCTCTGTAAAGGTTGAGCCTG                                                                        |
| OsMADS65cds                    | CACCATGGCGCGGAGGGGAGAGTGCAG                                                                  | TGCACTTCTTCTCCTG CCCCCTA                                                                       |
| OsMADS66cds                    | CACCATGCACATATACAA AGAGCAGGAGGC                                                              | GTATACCTGGCATTGAT CTCTGCA                                                                      |
| OsMADS6cds                     | CACCATGGGGAGGGGAAGAGTTGA                                                                     | AAGAACCCTCCAGCAT GAAGTT                                                                        |
| OsMADS7/45cds                  | CACCATGGGGAGGGGTGGGTTGGAGCTGA                                                                | TGGTAGCCATGGGGGCATGTAGGTGTT                                                                    |
| OsMADS8/24cds                  | CACCATGGGGAGAGGGAGGGTGGAGCTG                                                                 | GGGTAGCCATGTCGGCAT GAAGGCA                                                                     |
| OsMADS13cds                    | CACCATGGGGAGGGGAGGATTGAGA                                                                    | GAAGTGAGGAGGCGGCGCTCGG                                                                         |
| OsRR14cds                      | CACCATGGCTCGCAAGATGATC ATGGTG                                                                | AGCAAGTCTAAATTTGGC AAGGATGACTC                                                                 |
| OsMADS21cds                    | CACCATGGGGAGGGGGAAGATTGAGATAAAGAGA                                                           | GCCTTTGCCGAGTGCAC CTTGAA                                                                       |
| OsMADS29cds                    | CACCATGGGGCGGGCAAGAT                                                                         | CCACAGCTGCAGGCCGTG                                                                             |
